# Supplementary material for: Body Weight Status and Dietary Intakes of Urban Malay Primary School Children: Evidence from the Family Diet Study
Source: MDPI journal article supplement (doi:10.3390/children4010005), 2017-01-20
Supplement: s1 [file s1]

# Supplementary Materials: Body Weight Status and Dietary Intakes of Urban Malay Primary School Children: Evidence from the Family Diet Study

Wai Yew Yang, Tracy Burrows, Lesley MacDonald-Wicks, Lauren T. Williams, Clare E. Collins, Winnie Siew Swee Chee, and Kim Colyvas

**Table S1:** Food grouping scheme.

|               | Major Food Groups                         | Sub Food Groups                        |
|---------------|-------------------------------------------|----------------------------------------|
|               |                                           |                                        |
| <b>STEP 1</b> | Cereals/tubers/grains                     | Sugar-sweetened beverages              |
|               | Fruits                                    | Western fast food                      |
|               | Vegetables                                | Pastries and dessert (Local & Western) |
|               | Meat/poultry/fish                         | Snacks                                 |
|               | Legumes                                   | Spreads                                |
|               | Milk and dairy products                   | Sugar                                  |
|               |                                           | Oils                                   |
|               |                                           | Condiments                             |
|               |                                           | Mixed food                             |
| <b>STEP 2</b> | <b>Combined Food Groups</b>               |                                        |
|               | Cereals (Cereals/tubers/grains)           |                                        |
|               | Fruits/vegetables                         |                                        |
|               | Meats (Meat/poultry/fish/legumes)         |                                        |
|               | Dairy (Milk/dairy products)               |                                        |
|               | Sugar-sweetened beverages                 |                                        |
|               | Western fast food                         |                                        |
|               | Snacks                                    |                                        |
|               | Sweets (Pastries/desserts/sugar)          |                                        |
|               | Oils (spreads/oils/condiments) Mixed food |                                        |

**Table S2.** Classification of energy misreporting for all children sorted by gender and BMI category.

| Classification of Energy Mis-reporting <sup>a</sup> | All Children<br>( <i>n</i> = 236) | Gender                    |                            | BMI Category                 |                             |                                |                           |
|-----------------------------------------------------|-----------------------------------|---------------------------|----------------------------|------------------------------|-----------------------------|--------------------------------|---------------------------|
|                                                     |                                   | Boys<br>( <i>n</i> = 112) | Girls<br>( <i>n</i> = 124) | Thinness<br>( <i>n</i> = 24) | Normal<br>( <i>n</i> = 124) | Overweight<br>( <i>n</i> = 31) | Obese<br>( <i>n</i> = 39) |
| Under-reporter                                      | 54 (22.9)                         | 31 (28) *                 | 23 (19)                    | 3 (13) *                     | 20 (14)                     | 13 (42) *                      | 18 (46) *                 |
| Plausible reporter                                  | 141 (59.8)                        | 68 (61)                   | 73 (59)                    | 12 (50)                      | 93 (66)                     | 17 (55)                        | 19 (49)                   |
| Over-reporter                                       | 41 (17.4)                         | 13 (12) *                 | 28 (23)                    | 9 (37) *                     | 29 (20)                     | 1 (3)                          | 2 (5) *                   |

BMI, Body Mass Index; <sup>a</sup>, Black and Cole cut-point; \*, Significant difference (Pearson Chi-squared test between genders; by body weight status).

**Table S3.** Characteristics of children's dietary intakes (energy, macronutrients, micronutrients, and food groups).

| Energy and Macronutrients                         | Min  | Average Daily Intake (n = 236) |        | Mean (95% CI)  | Max    |
|---------------------------------------------------|------|--------------------------------|--------|----------------|--------|
| Energy (kcal/d)                                   | 588  | 1698 (1637-1759)               |        |                | 3795   |
| Carbohydrate (g/d)                                | 88.1 | 229.1 (220.3-237.9)            |        |                | 536.8  |
| Protein (g/d)                                     | 16.5 | 64.5 (61.5-67.4)               |        |                | 151.9  |
| Fat (g/d)                                         | 15.2 | 58.4 (55.7-61.0)               |        |                | 142.1  |
| Energy/body weight (kcal/kg)                      | 18.8 | 56.8 (54.0-59.7)               |        |                | 111.5  |
| Micronutrients                                    | Min  | 25% Percentile                 | Median | 75% Percentile | Max    |
| Thiamin (mg/day)                                  | 0.1  | 0.4                            | 0.6    | 0.8            | 3.6    |
| Riboflavin (mg/day)                               | 0.1  | 0.6                            | 0.9    | 1.2            | 3.8    |
| Niacin (mg/day)                                   | 0.3  | 4.9                            | 7.4    | 11.2           | 40.5   |
| Vitamin C (mg/day) *                              | 0    | 14.6                           | 31.5   | 66.9           | 477.9  |
| Vitamin A (µg/day)                                | 68.7 | 383.5                          | 521.9  | 800.9          | 5665.6 |
| Iron (mg/day)                                     | 3.8  | 9.5                            | 12.3   | 17.2           | 43.1   |
| Calcium (mg/day) *                                | 76.7 | 270.0                          | 374.4  | 559.4          | 1715.5 |
| Main Food Groups Cereals/tubers/grains g/day      | 0    | 294.3                          | 397.5  | 532.5          | 941.5  |
| Servings/day                                      | 0    | 3.0                            | 3.7    | 4.7            | 7.8    |
| Meat/poultry/fish (g)                             |      |                                |        |                |        |
| g/day                                             | 0    | 59.0                           | 108.8  | 171.0          | 554.5  |
| Servings/day                                      | 0    | 1.3                            | 2.1    | 2.9            | 7.9    |
| Vegetables (g) g/day                              | 0    | 0                              | 8.8    | 40.0           | 366.0  |
| Servings/day                                      | 0    | 0                              | 0.1    | 0.5            | 4.9    |
| Fruits (g)                                        |      |                                |        |                |        |
| g/day                                             | 0    | 0                              | 0      | 55.0           | 300.0  |
| Servings/day                                      | 0    | 0                              | 0      | 0.4            | 3.6    |
| Milk and dairy products (g)                       |      |                                |        |                |        |
| g/day                                             | 0    | 0                              | 0      | 65.0           | 662.5  |
| Servings/day                                      | 0    | 0                              | 0      | 0.2            | 2.9    |
| Legumes (g) g/day                                 | 0    | 0                              | 0      | 0              | 300.0  |
| Servings/day                                      | 0    | 0                              | 0      | 0              | 4.6    |
| Sub Food Groups Sugar-sweetened beverages (g/day) | 0    | 18.0                           | 134.0  | 274.0          | 1243.0 |
| Sugar (g/day)                                     | 0    | 10.0                           | 22.8   | 39.0           | 174.5  |
| Condiments(g/day) *                               | 0    | 2.5                            | 10.0   | 19.4           | 112.5  |
| Pastries and dessert (Local & Western) (g/day) *  | 0    | 0                              | 30.0   | 81.5           | 778.5  |
| Oils (g/day)                                      | 0    | 0                              | 6.8    | 20.0           | 198.0  |
| Snacks (g/day)                                    | 0    | 0                              | 3.8    | 25.8           | 175.0  |
| Western fast food (g/day)                         | 0    | 0                              | 0      | 0              | 681.9  |
| Mixed food (g/day) *                              | 0    | 0                              | 0      | 0              | 515.0  |
| Spreads (g/day)                                   | 0    | 0                              | 0      | 0              | 40.0   |

\*, Significant differences (Mann-Whitney test between gender).

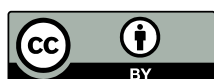

© 2017 by the authors. Submitted for possible open access publication under the terms and conditions of the Creative Commons Attribution (CC-BY) license (<http://creativecommons.org/licenses/by/4.0/>).
